# Supplementary material
Source: HighWire-hosted journal article supplement (https://thorax.bmj.com/content/thoraxjnl-2020-215267)
Supplement: inline-supplementary-material-1 [file inline-supplementary-material-1.pdf]

**Supplementary Table 1.** Pairwise post-hoc 2-by-2 comparisons with Holm's correction for multiplicity. Relative risk ratios were obtained from a multinomial model. Both 99% Confidence Intervals (99% CI) and P-values are adjusted to account for the three comparisons for each variable. No relative risk ratio was computed for study outcomes (ICU stay, length of stay, cost and fatal outcome).

| Characteristics                               | Post-lung resection vs. No cancer no surgery |         | Cancer no surgery vs. No cancer no surgery |         | Post-lung resection vs. Cancer no surgery |         |
|-----------------------------------------------|----------------------------------------------|---------|--------------------------------------------|---------|-------------------------------------------|---------|
|                                               | Relative risk ratio (99% CI)                 | P       | Relative risk ratio (99% CI)               | P       | Relative risk ratio (99% CI)              | P       |
| Gender. male                                  | 1.62 (1.38 to 1.90)                          | <0.0001 | 1.28 (1.17 to 1.41)                        | <0.0001 | 1.26 (1.09 to 1.46)                       | <0.0001 |
| Age. (per decade)                             | 0.99 (0.96 to 1.03)                          | 0.70    | 1.17 (1.14 to 1.20)                        | <0.0001 | 0.85 (0.81 to 0.89)                       | <0.0001 |
| Charlson Comorbidity Index (per score unit)   | 1.40 (1.37 to 1.44)                          | <0.0001 | 1.69 (1.65 to 1.72)                        | <0.0001 | 0.83 (0.81 to 0.85)                       | <0.0001 |
| Alcohol abuse (F10*)                          | 0.90 (0.74 to 1.10)                          | 0.19    | 0.75 (0.65 to 0.87)                        | <0.0001 | 1.20 (0.95 to 1.52)                       | 0.060   |
| Smoking (F17*)                                | 1.94 (1.67 to 2.25)                          | <0.0001 | 0.78 (0.70 to 0.88)                        | <0.0001 | 2.47 (2.08 to 2.94)                       | <0.0001 |
| Malnutrition and/or Cachexia (E43; E44*; R64) | 1.38 (1.22 to 1.57)                          | <0.0001 | 2.09 (1.91 to 2.29)                        | <0.0001 | 0.66 (0.58 to 0.76)                       | <0.0001 |
| Performance status $\geq 3$ (R26.30)          | 0.24 (0.12 to 0.47)                          | <0.0001 | 0.88 (0.71 to 1.09)                        | 0.14    | 0.27 (0.14 to 0.52)                       | <0.0001 |
| Hypertension (I10)                            | 1.21 (1.05 to 1.38)                          | <0.0001 | 0.93 (0.85 to 1.01)                        | 0.024   | 1.30 (1.11 to 1.52)                       | <0.0001 |
| Atherosclerosis (I25*)                        | 1.28 (1.02 to 1.62)                          | 0.0057  | 0.96 (0.82 to 1.11)                        | 0.47    | 1.34 (1.03 to 1.74)                       | 0.0035  |
| Hyperlipidemia (E78.0-2; E78.4-5)             | 1.72 (1.38 to 2.16)                          | <0.0001 | 1.13 (0.94 to 1.35)                        | 0.053   | 1.53 (1.22 to 1.91)                       | <0.0001 |
| Atrial fibrillation (I48*)                    | 1.30 (1.11 to 1.53)                          | <0.0001 | 1.02 (0.91 to 1.15)                        | 0.56    | 1.27 (1.08 to 1.49)                       | 0.0002  |
| COPD (J44*; J47; J96.1*)                      | 2.29 (1.98 to 2.66)                          | <0.0001 | 1.01 (0.91 to 1.12)                        | 0.84    | 2.27 (1.91 to 2.69)                       | <0.0001 |
| Sleep Apnea (G47.3)                           | 1.21 (0.89 to 1.64)                          | 0.13    | 0.77 (0.60 to 0.99)                        | 0.009   | 1.57 (1.06 to 2.32)                       | 0.003   |
| Ascites (R18)                                 | 0.24 (0.12 to 0.49)                          | <0.0001 | 1.11 (0.89 to 1.38)                        | 0.25    | 0.22 (0.10 to 0.47)                       | <0.0001 |
| Pleural empyema with fistula (J860)           | 5.40 (4.70 to 6.21)                          | <0.0001 | 5.36 (4.93 to 5.83)                        | <0.0001 | 1.01 (0.88 to 1.15)                       | 0.91    |
| SAPS II (per 10 score units)                  | 1.11 (1.08 to 1.14)                          | <0.0001 | 1.00 (0.99 to 1.02)                        | 0.025   | 1.11 (1.08 to 1.14)                       | <0.0001 |
| ICU                                           | —                                            | <0.0001 | —                                          | 0.13    | —                                         | <0.0001 |
| Length of Stay (days)                         | —                                            | <0.0001 | —                                          | <0.0001 | —                                         | <0.0001 |
| Cost. (€)                                     | —                                            | <0.0001 | —                                          | <0.0001 | —                                         | <0.0001 |
| Fatal outcome                                 | —                                            | <0.0001 | —                                          | <0.0001 | —                                         | <0.0001 |

**Supplementary Table 2.** Characteristics of patients with and without fistula in the whole population and in the three subgroups.

| Characteristics                               | Overall with fistula | Overall without fistula | p value | Post lung resection with fistula | Post lung resection without fistula | p value | Associated cancer no previous lung surgery with fistula | Associated cancer no previous lung surgery without fistula | p value | no surgery no cancer with fistula | no surgery no cancer without fistula | p value |
|-----------------------------------------------|----------------------|-------------------------|---------|----------------------------------|-------------------------------------|---------|---------------------------------------------------------|------------------------------------------------------------|---------|-----------------------------------|--------------------------------------|---------|
| patients. number (%)                          | 7425                 | 16084                   |         | 1222                             | 1077                                |         | 3748                                                    | 3326                                                       |         | 2455                              | 11681                                |         |
| Male sex. number (%)                          | 5590 (75.3%)         | 11268 (70.1%)           | <.0001  | 1017 (83.2%)                     | 788 (73.2%)                         | <.0001  | 2870 (76.6%)                                            | 2389 (71.8%)                                               | <.0001  | 1703 (69.4%)                      | 8091 (69.3%)                         | 0.92    |
| mean age. years (SD)                          | 62.2 (±13.1)         | 62.5 (±16.6)            | 0.14    | 61.5 (±11.9)                     | 60.8 (±13.2)                        | 0.216   | 63.5 (±10.4)                                            | 66.7 (±12.2)                                               | <.0001  | 60.6 (±16.6)                      | 61.5 (±17.7)                         | 0.0290  |
| age classes. number (%)                       |                      |                         | 0.0078  |                                  |                                     | 0.345   |                                                         |                                                            | <.0001  |                                   |                                      | 0.0116  |
| 18-40 y                                       | 457 (6.2%)           | 1730 (10.8%)            |         | 67 (5.5%)                        | 84 (7.8%)                           |         | 66 (1.8%)                                               | 65 (2%)                                                    |         | 324 (13.2%)                       | 1581 (13.5%)                         |         |
| 41-60 y                                       | 2674 (36.0%)         | 5087 (31.6%)            |         | 447 (36.6%)                      | 379 (35.2%)                         |         | 1391 (37.1%)                                            | 917 (27.6%)                                                |         | 836 (34.1%)                       | 3791 (32.5%)                         |         |
| 61-80 y                                       | 3757 (50.6%)         | 6835 (42.5%)            |         | 670 (54.8%)                      | 574 (53.3%)                         |         | 2097 (56%)                                              | 1893 (56.9%)                                               |         | 990 (40.3%)                       | 4368 (37.4%)                         |         |
| >80 y                                         | 537 (7.2%)           | 2432 (15.1%)            |         | 38 (3.1%)                        | 40 (3.7%)                           |         | 194 (5.2%)                                              | 451 (13.6%)                                                |         | 305 (12.4%)                       | 1941 (16.6%)                         |         |
| Charlson Comorbidity Index. mean (SD)         | 5.4 (±3.5)           | 4.0 (±3.3)              | <.0001  | 5.7 (±3.6)                       | 4.8 (±3.4)                          | <.0001  | 7 (±3.2)                                                | 7.7 (±3.3)                                                 | <.0001  | 2.9 (±2.2)                        | 2.9 (±2.3)                           | 0.716   |
| Other comorbidities. number (%)               |                      |                         |         |                                  |                                     |         |                                                         |                                                            |         |                                   |                                      |         |
| alcohol abuse (F10*)                          | 740 (10.0%)          | 1557 (9.7%)             | 0.493   | 119 (9.7%)                       | 103 (9.6%)                          | 0.888   | 354 (9.5%)                                              | 224 (6.7%)                                                 | <.0001  | 267 (10.9%)                       | 1230 (10.5%)                         | 0.613   |
| malnutrition and/or Cachexia (E43; E44*; R64) | 3235 (43.6%)         | 4696 (29.2%)            | <.0001  | 492 (40.3%)                      | 312 (29%)                           | <.0001  | 1870 (49.9%)                                            | 1302 (39.2%)                                               | <.0001  | 873 (35.6%)                       | 3082 (26.4%)                         | <.0001  |
| Performance status ≥ 3 (R26.30)               | 181 (2.4%)           | 565 (3.5%)              | <.0001  | 15 (1.2%)                        | 5 (0.5%)                            | 0.049   | 100 (2.7%)                                              | 123 (3.7%)                                                 | 0.013   | 66 (2.7%)                         | 437 (3.7%)                           | 0.011   |
| Arterial hypertension (I10)                   | 1907 (25.7%)         | 4349 (27.0%)            | 0.029   | 386 (31.6%)                      | 315 (29.3%)                         | 0.224   | 889 (23.7%)                                             | 895 (26.9%)                                                | 0.0020  | 632 (25.7%)                       | 3139 (26.9%)                         | 0.25    |
| Atherosclerosis (I25*)                        | 520 (7%)             | 1077 (6.7%)             | 0.384   | 119 (9.7%)                       | 75 (7%)                             | 0.017   | 210 (5.6%)                                              | 245 (7.4%)                                                 | 0.003   | 191 (7.8%)                        | 757 (6.5%)                           | 0.019   |
| Hyperlipidemia (E78.0-2; E78.4-5)             | 472 (6.4%)           | 995 (6.2%)              | 0.615   | 121 (9.9%)                       | 95 (8.8%)                           | 0.376   | 224 (6%)                                                | 225 (6.8%)                                                 | 0.175   | 127 (5.2%)                        | 675 (5.8%)                           | 0.239   |
| Atrial fibrillation (I48*)                    | 1274 (17.2%)         | 2533 (15.8%)            | 0.006   | 290 (23.7%)                      | 159 (14.8%)                         | <.0001  | 580 (15.5%)                                             | 555 (16.7%)                                                | 0.166   | 404 (16.5%)                       | 1819 (15.6%)                         | 0.274   |
| COPD (J44*; J47; J96.1*)                      | 1327 (17.9%)         | 2294 (14.3%)            | <.0001  | 360 (29.5%)                      | 267 (24.8%)                         | 0.012   | 538 (14.4%)                                             | 466 (14%)                                                  | 0.68    | 429 (17.5%)                       | 1561 (13.4%)                         | <.0001  |
| Sleep Apnea (G47.3)                           | 229 (3.1%)           | 477 (3.0%)              | 0.621   | 50 (4.1%)                        | 37 (3.4%)                           | 0.411   | 91 (2.4%)                                               | 82 (2.5%)                                                  | 0.919   | 88 (3.6%)                         | 358 (3.1%)                           | 0.181   |
| Ascites (R18)                                 | 154 (2.1%)           | 483 (3%)                | <.0001  | 8 (0.7%)                         | 8 (0.7%)                            | 0.8     | 77 (2.1%)                                               | 144 (4.3%)                                                 | <.0001  | 69 (2.8%)                         | 331 (2.8%)                           | 0.9500  |
| Germs. number (%)                             |                      |                         |         |                                  |                                     |         |                                                         |                                                            |         |                                   |                                      |         |
| Escherichia coli (B96.2)                      | 753 (10.1%)          | 1267 (7.9%)             | <.0001  | 137 (11.2%)                      | 98 (9.1%)                           | 0.095   | 352 (9.4%)                                              | 375 (11.3%)                                                | 0.009   | 264 (10.8%)                       | 794 (6.8%)                           | <.0001  |
| Klebsiella pneumoniae (B96.1)                 | 471 (6.3%)           | 520 (3.2%)              | <.0001  | 92 (7.5%)                        | 45 (4.2%)                           | 7E-04   | 207 (5.5%)                                              | 118 (3.6%)                                                 | <.0001  | 172 (7%)                          | 357 (3.1%)                           | <.0001  |

|                                           |                             |                             |        |                              |                              |        |                              |                             |        |                             |                             |        |
|-------------------------------------------|-----------------------------|-----------------------------|--------|------------------------------|------------------------------|--------|------------------------------|-----------------------------|--------|-----------------------------|-----------------------------|--------|
| Pseudomonas (aeruginosa) (B96.5)          | 754 (10.2%)                 | 790 (4.9%)                  | <.0001 | 136 (11.1%)                  | 78 (7.2%)                    | 0.001  | 381 (10.2%)                  | 178 (5.4%)                  | <.0001 | 237 (9.7%)                  | 534 (4.6%)                  | <.0001 |
| Streptococcus (B95.0-5)                   | 1236 (16.7%)                | 3013 (18.7%)                | <.0001 | 268 (21.9%)                  | 180 (16.7%)                  | 0.002  | 520 (13.9%)                  | 674 (20.3%)                 | <.0001 | 448 (18.3%)                 | 2159 (18.5%)                | 0.785  |
| Streptococcus A (B95.0)                   | 48 (0.6%)                   | 173 (1.1%)                  | 0.0002 | 15 (1.2%)                    | 7 (0.6%)                     | 0.22   | 18 (0.5%)                    | 28 (0.8%)                   | 0.081  | 15 (0.6%)                   | 138 (1.2%)                  | 0.018  |
| Streptococcus B (B95.1)                   | 45 (0.6%)                   | 118 (0.7%)                  | 0.31   | 12 (1%)                      | 7 (0.6%)                     | 0.518  | 16 (0.4%)                    | 23 (0.7%)                   | 0.18   | 17 (0.7%)                   | 88 (0.8%)                   | 0.85   |
| Streptococcus D (B95.2)                   | 421 (5.7%)                  | 539 (3.4%)                  | <.0001 | 74 (6.1%)                    | 45 (4.2%)                    | 0.053  | 199 (5.3%)                   | 167 (5%)                    | 0.622  | 148 (6%)                    | 327 (2.8%)                  | <.0001 |
| Streptococcus pneumoniae (B95.3)          | 97 (1.3%)                   | 421 (2.6%)                  | <.0001 | 28 (2.3%)                    | 29 (2.7%)                    | 0.63   | 34 (0.9%)                    | 98 (2.9%)                   | <.0001 | 35 (1.4%)                   | 294 (2.5%)                  | 0.001  |
| Streptococcus. others (B95.4)             | 661 (8.9%)                  | 1638 (10.2%)                | 0.002  | 156 (12.8%)                  | 87 (8.1%)                    | <.0001 | 272 (7.3%)                   | 351 (10.6%)                 | <.0001 | 233 (9.5%)                  | 1200 (10.3%)                | 0.26   |
| Streptococcus. unspecified (B95.5)        | 145 (2%)                    | 337 (2.1%)                  | 0.51   | 24 (2%)                      | 21 (1.9%)                    | 0.99   | 63 (1.7%)                    | 63 (1.9%)                   | 0.56   | 58 (2.4%)                   | 253 (2.2%)                  | 0.60   |
| Staphylococcus (B95.6-8)                  | 1148 (15.5%)                | 2169 (13.5%)                | <.0001 | 263 (21.5%)                  | 273 (25.4%)                  | 0.03   | 481 (12.8%)                  | 588 (17.7%)                 | <.0001 | 404 (16.5%)                 | 1308 (11.2%)                | <.0001 |
| Staphylococcus Aureus (B95.6)             | 738 (9.9%)                  | 1456 (9.1%)                 | 0.03   | 176 (14.4%)                  | 208 (19.3%)                  | 0.002  | 277 (7.4%)                   | 399 (12%)                   | <.0001 | 285 (11.6%)                 | 849 (7.3%)                  | <.0001 |
| Staphylococcus. others (B95.7)            | 482 (6.5%)                  | 747 (4.6%)                  | <.0001 | 96 (7.9%)                    | 74 (6.9%)                    | 0.41   | 229 (6.1%)                   | 202 (6.1%)                  | 0.99   | 157 (6.4%)                  | 471 (4%)                    | <.0001 |
| Staphylococcus. unspecified (B95.8)       | 30 (0.4%)                   | 63 (0.4%)                   | 0.98   | 7 (0.6%)                     | 1 (0.1%)                     | 0.11   | 17 (0.5%)                    | 22 (0.7%)                   | 0.31   | 6 (0.2%)                    | 40 (0.3%)                   | 0.56   |
| Other bacteria (B96.0; B96.3-4; B96.6-8*) | 1391 (18.7%)                | 2125 (13.2%)                | <.0001 | 289 (23.7%)                  | 171 (15.9%)                  | <.0001 | 646 (17.2%)                  | 498 (15%)                   | 0.01   | 456 (18.6%)                 | 1456 (12.5%)                | <.0001 |
| Length of Stay. median (IQ range) days    | 25 (13-47)                  | 18 (10-30)                  | <.0001 | 33 (19-57)                   | 22 (13-35)                   | <.0001 | 24 (11-44)                   | 21 (11-35)                  | <.0001 | 24 (11-48)                  | 17 (10-28)                  | <.0001 |
| SAPS II. median (IQ range)                | 0 (0-36)                    | 0 (0-30)                    | <.0001 | 25.5 (0-41)                  | 15 (0-32)                    | <.0001 | 0 (0-31)                     | 0 (0-35)                    | <.0001 | 16 (0-40)                   | 0 (0-28)                    | <.0001 |
| ICU. number (%)                           | 1420 (19.1%)                | 2488 (15.5%)                | <.0001 | 257 (21%)                    | 140 (13%)                    | <.0001 | 474 (12.7%)                  | 406 (12.2%)                 | 0.576  | 689 (28.1%)                 | 1942 (16.6%)                | <.0001 |
| Cost. median (IQ range) €                 | 18 119.8 (8 222.0-38 079.7) | 11 145.0 (6 262.5-20 924.0) | <.0001 | 31 028.5 (17 432.3-54 878.9) | 19 861.0 (10 760.6-31 792.7) | <.0001 | 14 534.2 (6 873.1- 31 213.5) | 12 545.4 (6 912.7-23 179.3) | <.0001 | 18 133.6 (7 839.7-39 283.9) | 10 309.6 (6 011.9-18 933.4) | <.0001 |
| Fatal outcome. number (%)                 | 2003 (27.0%)                | 2007 (12.5%)                | <.0001 | 302 (24.7%)                  | 105 (9.8%)                   | <.0001 | 1273 (34%)                   | 817 (24.6%)                 | <.0001 | 428 (17.4%)                 | 1085 (9.3%)                 | <.0001 |

**Supplementary Table 3.** Multivariable analysis of factors associated with length of stay longer than 19 days (median for the whole cohort). in the whole population and in the three subgroups.

| Characteristic              | All patients     |         | Post lung resection |         | Associated cancer no previous lung surgery |         | No surgery no cancer |         | Quantitative interaction | Qualitative interaction |
|-----------------------------|------------------|---------|---------------------|---------|--------------------------------------------|---------|----------------------|---------|--------------------------|-------------------------|
|                             | OR (99% CI)      | P       | OR (99% CI)         | P       | OR (99% CI)                                | P       | OR (99% CI)          | P       | P                        | P                       |
| Male gender                 | 0.89 (0.82-0.97) | 0.0004  | 0.97 (0.72-1.32)    | 0.82    | 1.05 (0.90-1.22)                           | 0.43    | 0.82 (0.74-0.91)     | <0.0001 | 0.002                    | 0.40                    |
| Age classes                 |                  |         |                     |         |                                            |         |                      |         |                          |                         |
| 18-40 y                     | 1                |         | 1                   |         | 1                                          |         | 1                    |         |                          |                         |
| 41-60 y                     | 0.90 (0.78-1.04) | 0.063   | 0.56 (0.33-0.97)    | 0.007   | 0.70 (0.42-1.17)                           | 0.075   | 1.01 (0.86-1.18)     | 0.93    | 0.010                    | 0.72                    |
| 61-80 y                     | 0.69 (0.59-0.81) | <0.0001 | 0.42 (0.24-0.75)    | 0.0001  | 0.66 (0.39-1.10)                           | 0.036   | 0.65 (0.54-0.79)     | <0.0001 | 0.18                     | 0.75                    |
| > 80 y                      | 0.47 (0.39-0.57) | <0.0001 | 0.29 (0.12-0.69)    | 0.0003  | 0.47 (0.27-0.83)                           | 0.0005  | 0.41 (0.33-0.52)     | <0.0001 | 0.46                     | 0.75                    |
| Charlson Comorbidity Index  |                  |         |                     |         |                                            |         |                      |         |                          |                         |
| 0-2                         | 1                |         | 1                   |         | 1                                          |         | 1                    |         |                          |                         |
| 3-4                         | 1.37 (1.22-1.54) | <0.0001 | 1.42 (0.97-2.06)    | 0.017   | 0.99 (0.65-1.49)                           | 0.94    | 1.56 (1.34-1.81)     | <0.0001 | 0.029                    | 0.72                    |
| 5-6                         | 1.91 (1.64-2.21) | <0.0001 | 1.76 (1.13-2.73)    | 0.0009  | 1.22 (0.79-1.87)                           | 0.24    | 2.28 (1.88-2.77)     | <0.0001 | 0.002                    | 0.75                    |
| > 6                         | 1.89 (1.63-2.20) | <0.0001 | 2.24 (1.49-3.36)    | <0.0001 | 1.23 (0.82-1.86)                           | 0.18    | 2.12 (1.66-2.71)     | <0.0001 | 0.007                    | 0.75                    |
| Alcohol abuse               | 1.51 (1.31-1.73) | <0.0001 | 1.57 (0.95-2.59)    | 0.020   | 1.09 (0.83-1.44)                           | 0.41    | 1.71 (1.44-2.03)     | <0.0001 | 0.002                    | 0.75                    |
| Smoking                     | 1.01 (0.90-1.13) | 0.83    | 1.37 (1.00-1.87)    | 0.010   | 1.14 (0.91-1.43)                           | 0.13    | 0.92 (0.79-1.06)     | 0.12    | 0.004                    | 0.13                    |
| Malnutrition or cachexia    | 3.01 (2.77-3.26) | <0.0001 | 3.71 (2.78-4.97)    | <0.0001 | 2.67 (2.34-3.05)                           | <0.0001 | 3.18 (2.85-3.55)     | <0.0001 | 0.007                    | 0.75                    |
| Performance status $\geq 3$ | 1.51 (1.22-1.88) | <0.0001 | —                   | —       | 1.35 (0.91-2.00)                           | 0.049   | 1.55 (1.19-2.01)     | <0.0001 | 0.72                     | 0.50                    |
| Hypertension                | 1.30 (1.19-1.43) | <0.0001 | 1.04 (0.77-1.41)    | 0.75    | 1.45 (1.23-1.70)                           | <0.0001 | 1.26 (1.12-1.42)     | <0.0001 | 0.032                    | 0.75                    |
| Atherosclerosis             | 1.32 (1.13-1.54) | <0.0001 | 1.12 (0.69-1.83)    | 0.54    | 1.10 (0.83-1.46)                           | 0.40    | 1.46 (1.19-1.79)     | <0.0001 | 0.080                    | 0.75                    |
| Hyperlipidemia              | 1.21 (1.03-1.42) | 0.003   | 1.03 (0.65-1.63)    | 0.85    | 1.33 (0.99-1.78)                           | 0.014   | 1.17 (0.95-1.45)     | 0.056   | 0.46                     | 0.75                    |
| Atrial fibrillation         | 1.81 (1.63-2.02) | <0.0001 | 1.83 (1.29-2.61)    | <0.0001 | 1.96 (1.62-2.38)                           | <0.0001 | 1.73 (1.50-2.00)     | <0.0001 | 0.41                     | 0.75                    |
| COPD                        | 1.29 (1.16-1.43) | <0.0001 | 1.55 (1.14-2.10)    | 0.0002  | 1.18 (0.97-1.44)                           | 0.029   | 1.28 (1.11-1.47)     | <0.0001 | 0.17                     | 0.75                    |
| Sleep Apnea                 | 1.27 (1.02-1.58) | 0.006   | 0.82 (0.44-1.55)    | 0.43    | 1.50 (0.95-2.38)                           | 0.023   | 1.29 (0.98-1.70)     | 0.018   | 0.14                     | 0.41                    |
| Ascites                     | 1.78 (1.39-2.27) | <0.0001 | 0.90 (0.20-3.98)    | 0.85    | 1.98 (1.30-3.01)                           | <0.0001 | 1.62 (1.18-2.21)     | <0.0001 | 0.32                     | 0.68                    |
| Fistula                     | 1.47 (1.35-1.60) | <0.0001 | 1.84 (1.43-2.36)    | <0.0001 | 1.17 (1.03-1.34)                           | 0.002   | 1.71 (1.51-1.95)     | <0.0001 | <0.0001                  | 0.75                    |
| Need for ICU                | 2.33 (2.10-2.58) | <0.0001 | 1.32 (0.93-1.86)    | 0.039   | 1.46 (1.19-1.80)                           | <0.0001 | 2.85 (2.51-3.24)     | <0.0001 | <0.0001                  | 0.75                    |
| Study subgroup              |                  |         |                     |         |                                            |         |                      |         |                          |                         |
| No surgery. no cancer       | 1                |         |                     |         |                                            |         |                      |         |                          |                         |
| Lung resection              | 1.72 (1.49-1.97) | <0.0001 |                     |         |                                            |         |                      |         |                          |                         |
| Associated cancer           | 0.97 (0.87-1.09) | 0.50    |                     |         |                                            |         |                      |         |                          |                         |

**Supplementary Table 4. Multivariable analysis of factors associated with cost higher than 12.627 € (median for the whole cohort). in the whole population and in the three subgroups.**

| Characteristic               | All patients     |         | Post lung resection |         | Associated cancer no previous lung surgery |         | No surgery no cancer |         | Quantitative interaction | Qualitative interaction |
|------------------------------|------------------|---------|---------------------|---------|--------------------------------------------|---------|----------------------|---------|--------------------------|-------------------------|
|                              | OR (99% CI)      | P       | OR (99% CI)         | P       | OR (99% CI)                                | P       | OR (99% CI)          | P       | P                        | P                       |
| Male gender                  | 0.87 (0.80-0.95) | <0.0001 | 0.86 (0.62-1.21)    | 0.26    | 0.97 (0.83-1.12)                           | 0.56    | 0.83 (0.74-0.92)     | <0.0001 | 0.098                    | 0.75                    |
| Age classes                  |                  |         |                     |         |                                            |         |                      |         |                          |                         |
| 18-40 y                      | 1                |         | 1                   |         | 1                                          |         | 1                    |         |                          |                         |
| 41-60 y                      | 0.83 (0.71-0.96) | 0.0007  | 0.57 (0.31-1.04)    | 0.017   | 0.59 (0.35-1.00)                           | 0.009   | 0.92 (0.78-1.08)     | 0.18    | 0.022                    | 0.75                    |
| 61-80 y                      | 0.61 (0.52-0.71) | <0.0001 | 0.36 (0.19-0.69)    | <0.0001 | 0.52 (0.31-0.88)                           | 0.001   | 0.58 (0.48-0.70)     | <0.0001 | 0.19                     | 0.75                    |
| > 80 y                       | 0.31 (0.25-0.38) | <0.0001 | 0.30 (0.11-0.80)    | 0.002   | 0.28 (0.16-0.49)                           | <0.0001 | 0.28 (0.22-0.35)     | <0.0001 | 0.99                     | 0.75                    |
| Charlson Comorbidity Index   |                  |         |                     |         |                                            |         |                      |         |                          |                         |
| 0-2                          | 1                |         | 1                   |         | 1                                          |         | 1                    |         |                          |                         |
| 3-4                          | 1.26 (1.12-1.43) | <0.0001 | 1.57 (1.05-2.36)    | 0.004   | 1.09 (0.72-1.66)                           | 0.60    | 1.36 (1.16-1.59)     | <0.0001 | 0.25                     | 0.75                    |
| 5-6                          | 1.65 (1.42-1.93) | <0.0001 | 2.16 (1.32-3.54)    | <0.0001 | 1.20 (0.78-1.86)                           | 0.28    | 1.87 (1.53-2.29)     | <0.0001 | 0.032                    | 0.75                    |
| > 6                          | 1.61 (1.38-1.89) | <0.0001 | 3.12 (1.96-4.97)    | <0.0001 | 1.12 (0.74-1.69)                           | 0.49    | 1.92 (1.49-2.48)     | <0.0001 | 0.0001                   | 0.75                    |
| Alcohol abuse                | 1.39 (1.21-1.61) | <0.0001 | 2.90 (1.34-6.25)    | 0.0004  | 1.19 (0.90-1.58)                           | 0.11    | 1.43 (1.19-1.71)     | <0.0001 | 0.016                    | 0.75                    |
| Smoking                      | 1.21 (1.08-1.36) | <0.0001 | 1.85 (1.26-2.73)    | <0.0001 | 1.31 (1.04-1.65)                           | 0.003   | 1.11 (0.95-1.28)     | 0.079   | 0.004                    | 0.75                    |
| Malnutrition or cachexia     | 2.36 (2.17-2.56) | <0.0001 | 2.50 (1.79-3.50)    | <0.0001 | 2.14 (1.87-2.44)                           | <0.0001 | 2.54 (2.27-2.84)     | <0.0001 | 0.036                    | 0.75                    |
| Performance status $\geq 3$  | 1.16 (0.93-1.44) | 0.078   | —                   | —       | 1.15 (0.78-1.69)                           | 0.35    | 1.14 (0.87-1.48)     | 0.21    | 0.96                     | 0.75                    |
| Hypertension                 | 1.45 (1.32-1.60) | <0.0001 | 1.16 (0.81-1.67)    | 0.28    | 1.63 (1.38-1.93)                           | <0.0001 | 1.38 (1.22-1.56)     | <0.0001 | 0.031                    | 0.75                    |
| Atherosclerosis              | 1.41 (1.20-1.65) | <0.0001 | 1.21 (0.65-2.26)    | 0.43    | 1.36 (1.02-1.82)                           | 0.006   | 1.41 (1.14-1.74)     | <0.0001 | 0.83                     | 0.75                    |
| Hyperlipidemia               | 1.24 (1.05-1.47) | 0.0008  | 1.15 (0.65-2.02)    | 0.53    | 1.34 (1.00-1.81)                           | 0.010   | 1.19 (0.96-1.49)     | 0.040   | 0.66                     | 0.75                    |
| Atrial fibrillation          | 2.06 (1.84-2.31) | <0.0001 | 2.52 (1.59-4.01)    | <0.0001 | 2.24 (1.84-2.73)                           | <0.0001 | 1.93 (1.67-2.24)     | <0.0001 | 0.16                     | 0.75                    |
| COPD                         | 1.37 (1.22-1.53) | <0.0001 | 1.72 (1.18-2.51)    | 0.0002  | 1.16 (0.95-1.42)                           | 0.054   | 1.40 (1.21-1.63)     | <0.0001 | 0.031                    | 0.75                    |
| Sleep Apnea                  | 1.29 (1.02-1.62) | 0.005   | 1.14 (0.50-2.58)    | 0.69    | 1.86 (1.15-3.01)                           | 0.0008  | 1.13 (0.85-1.51)     | 0.26    | 0.068                    | 0.75                    |
| Ascites                      | 1.96 (1.52-2.51) | <0.0001 | 2.58 (0.17-40.1)    | 0.37    | 2.10 (1.37-3.19)                           | <0.0001 | 1.75 (1.27-2.40)     | <0.0001 | 0.64                     | 0.75                    |
| Pleural empyema with fistula | 1.59 (1.46-1.74) | <0.0001 | 1.82 (1.36-2.43)    | <0.0001 | 1.18 (1.03-1.35)                           | 0.002   | 2.06 (1.81-2.35)     | <0.0001 | <0.0001                  | 0.75                    |
| Need for ICU                 | 5.75 (5.10-6.48) | <0.0001 | 2.78 (1.72-4.49)    | <0.0001 | 3.49 (2.77-4.41)                           | <0.0001 | 7.01 (6.06-8.10)     | <0.0001 | <0.0001                  | 0.75                    |
| Study subgroup               |                  |         |                     |         |                                            |         |                      |         |                          |                         |
| No surgery, no cancer        | 1                |         |                     |         |                                            |         |                      |         |                          |                         |
| Lung resection               | 3.49 (2.99-4.07) | <0.0001 |                     |         |                                            |         |                      |         |                          |                         |
| Associated cancer            | 1.00 (0.89-1.12) | 0.93    |                     |         |                                            |         |                      |         |                          |                         |
